# Supplementary material for: Three-dimensional Co3O4/flocculent graphene hybrid on Ni foam for supercapacitor applications
Source: Royal Society of Chemistry journal article supplement (doi:10.1039/c4ta03313b), 2014-08-04
Supplement: c4ta03313b1.pdf [file c4ta03313b1.pdf]

## Supplementary Information

### Three-dimensional $\text{Co}_3\text{O}_4$ /flocculent graphene hybrid on Ni foam for supercapacitor applications

ChunHui Wu <sup>a</sup>, Qiang Shen <sup>a</sup>, Rui Mi <sup>a</sup>, SiXu Deng <sup>a</sup>, YingQi Shu <sup>a</sup>, Hao Wang <sup>a,b,\*</sup>, JingBing  
Liu <sup>a</sup>, Hui Yan <sup>a,b</sup>

<sup>a</sup> The College of Materials Science and Engineering, Beijing University of Technology, Beijing,  
100124, P.R. China

<sup>b</sup> Chengdu Green Energy and Green Manufacturing Technology R&D Centre, Shuangliu,  
Chengdu, 610207, P.R. China

This file include:

Supplementary Figure S1

Supplementary method

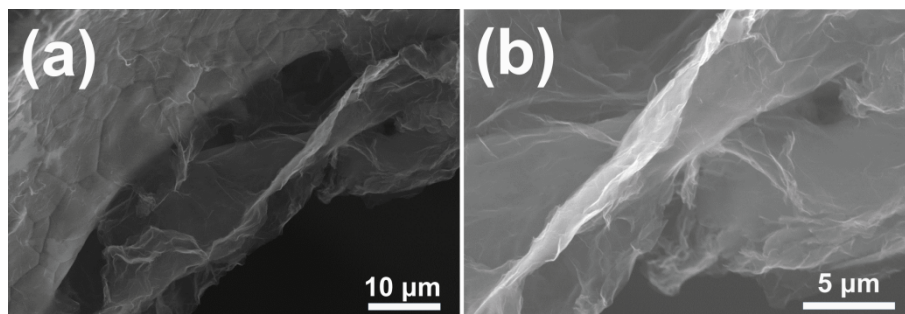

Supplementary Figure S1 SEM images of EG/NF.

Supplementary method

Preparation of EG/NF

In a typical preparation of EG/NF, 20 mg EG was dispersed into 10 mL water and ultrasonicated for more than 4 h. Then, EG/NF was prepared by filtering the dispersion through the Ni foam by vacuum suction. The obtained EG/NF was dried under 50 °C for 12 h.
